# Supplementary material for: Preoperative Chemoradiotherapy vs Chemotherapy for Adenocarcinoma of the Esophagogastric Junction: A Network Meta-Analysis
Source: PubMed Central journal article supplement (PMC11297377; doi:10.1001/jamanetworkopen.2024.25581), 2024-08-02
Supplement: jamanetwopen-e2425581-s002.pdf [file jamanetwopen-e2425581-s002.pdf]

## Data Sharing Statement

Ronellenfitch. Preoperative Chemoradiotherapy vs Chemotherapy for Adenocarcinoma of the Esophagogastric Junction. *JAMA Netw Open*. Published August 02, 2024.

doi:10.1001/jamanetworkopen.2024.25581

### Data

**Data available:** No

### Additional Information

**Explanation for why data not available:** The data is the property of the original trialists, with whom data sharing agreements would need to be reached.
